# Supplementary material
Source: HighWire-hosted journal article supplement (https://jnm.snmjournals.org/highwire/filestream/94928/field_highwire_adjunct_files/0/174904_Supplemental_Data.pdf)
Supplement: 174904_Supplemental_Data.pdf [file 174904_Supplemental_Data.pdf]

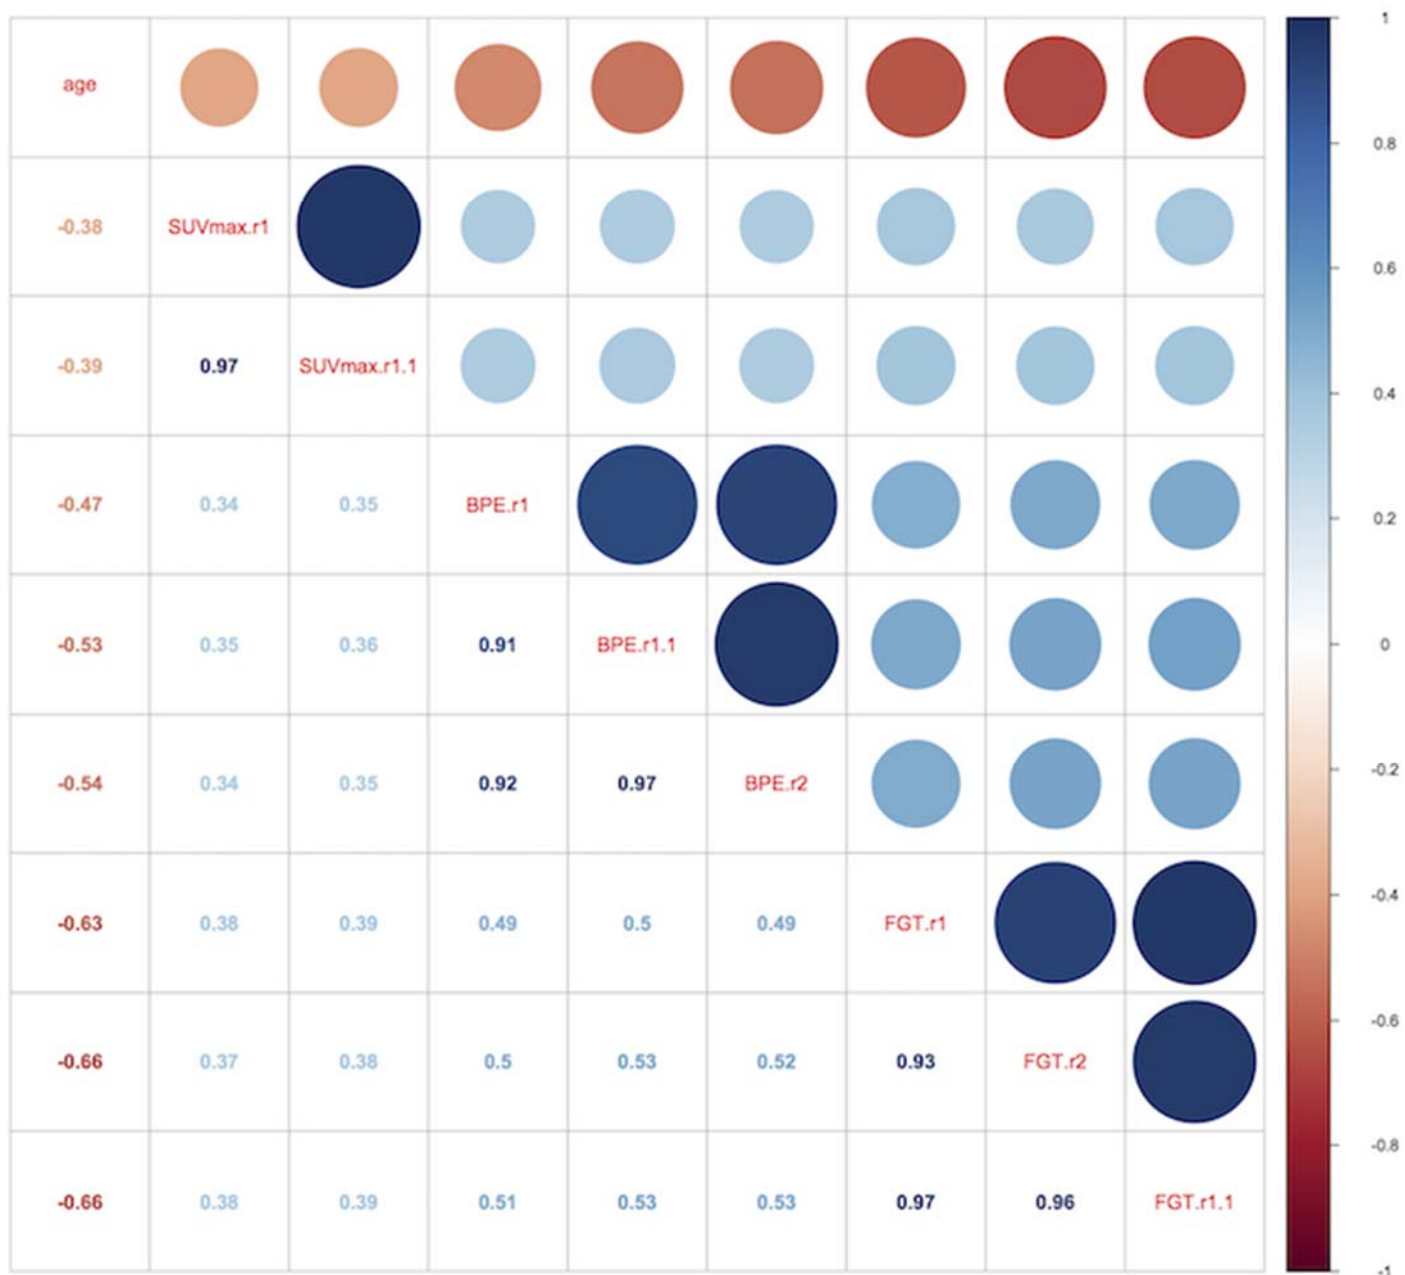

**SUPPLEMENTAL FIGURE 1.** Correlation coefficient matrix showing numeric, color-coded, and size-coded Spearman rank correlation coefficients for BPU SUV<sub>max</sub> on <sup>18</sup>F-FDG PET/CT, BPE, FGT, and age for the grouped analysis for both interpreters and reassessment of BPU SUV<sub>max</sub> by interpreter 1. Correlations ranged from moderate to strong and are marked in blue if positive and red if negative (cf. legend on the right).
